# Supplementary material for: Electron transfer quenching by nitroxide radicals of the fluorescence of carbon dots
Source: Royal Society of Chemistry journal article supplement (doi:10.1039/c2jm31191g), 2012-01-01
Supplement: c2jm31191g.pdf [file c2jm31191g.pdf]

Supplementary Data

## Electron Transfer Quenching by Nitroxide Radicals of the Fluorescence of Carbon Dots

Feng Lin, Dejun Pei, Weina He, Zhaoxia Huang, Yanjie Huang, Xiangqun Guo\*

The Key laboratory for Chemical Biology of Fujian Province, Department of Chemistry and the Key Laboratory of Analytical Sciences, College of Chemistry and Chemical Engineering, Xiamen University, Xiamen 361005, China.

*E-mail:* [xqguo@xmu.edu.cn](mailto:xqguo@xmu.edu.cn)

### Intermolecular quenching of CDs' fluorescence by TEMPO

Assuming the average binding sites on CDs surface are  $n$ , the electrostatic binding between CDs and 4-AT produce a non-fluorescent conjugate CD@TEMPO

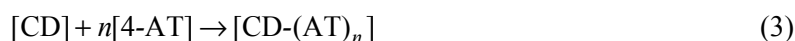

Where  $[CD-(AT)_n]$  stands for the concentration of CD@TEMPO. The apparent binding constant for (3) is given as

$$K_S = \frac{[CD-(AT)_n]}{[CD] \cdot [4-AT]^n} \quad (7)$$

And the mass conservation law gives

$$[CD]_0 = [CD] + [CD-(AT)_n] \quad (8)$$

Where  $[CD]_0$  stands to the initial concentrations of CDs. Considering that the fluorescence intensities are proportional to the concentrations of CDs, the apparent binding constant can be rewritten as

$$K_s = \frac{F_0 - F}{F \cdot [4-AT]^n} \quad (9)$$

Hence, we obtain the following relationship:

$$\frac{F_0}{F} = 1 + K_S [4-AT]^n \quad (10)$$

The following equation exists,

$$[4-AT] = [4-AT]_0 - n[CD-(AT)_n] \quad (11)$$

Where  $[4-AT]_0$  is the initial concentrations of 4-AT. Considering  $[4-AT]_0$  is far greater than  $[CD-(AT)_n]$ ,  $[4-AT]$  can be approximated to  $[4-AT]_0$ . Then (8) can be rewritten as

$$\frac{F_0}{F} = 1 + K_S [4-AT]_0^n \quad (12)$$

Inversion of equation of (8) gives the fraction of unbound CDs.

$$\frac{F}{F_0} = \frac{1}{1 + K_S [4-AT]_0^n} \quad (13)$$

As shown in the lifetime quenching experiments, a small portion of dynamic quenching contributed to the quenching of the fluorescence intensities of CDs. The fraction of CDs not quenched by collisional encounter is

$$\frac{F}{F_0} = \frac{1}{1 + K_D [4-AT]_0} \quad (14)$$

Then the corrected fluorescence remaining can be given by the product of the fraction of free CDs and the fraction not quenched by collisional encounters, and gives

$$\frac{F}{F_0} = \frac{1}{1 + K_D [4-AT]_0} \cdot \frac{1}{1 + K_S [4-AT]_0^n} \quad (15)$$

Rearrangement of (13) yields

$$\frac{F_0}{F} = 1 + K_D[4-AT]_0 + K_S[4-AT]_0^n + K_D[4-AT]_0^{n+1} \quad (4)$$

The value of  $K_D$  is  $28.2 \text{ M}^{-1}$ , as determined by lifetime quenching experiments. The modified Stern Volmer equation (4) fit quite well with the experiment data (figure 2(b)) and gives a  $K_S$  of  $3.73 \times 10^2 \text{ M}^{-1}$  and a  $n$  of 1.9. It demonstrates that the quenching mechanism can be well described by the multiple binding sites and combined dynamic and static quenching model.

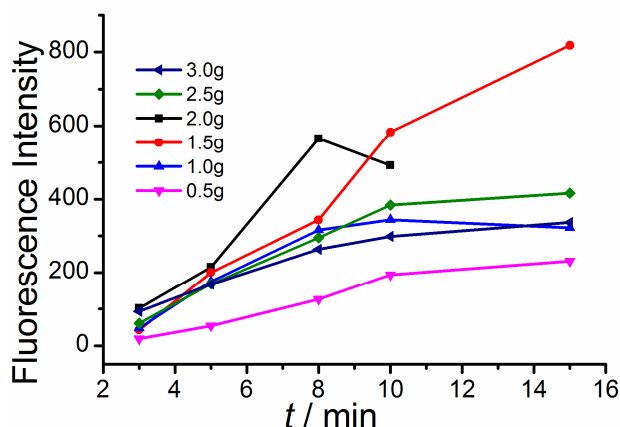

**Fig.S1** Fluorescence intensity ( $\lambda_{\text{ex}}=415 \text{ nm}$ ,  $\lambda_{\text{em}}=510 \text{ nm}$ ) of the CDs solution measured at different reaction time, synthesized at different sucrose concentration(3.0 g, 2.5 g, 2.0 g, 1.5 g, 1.0 g, 0.5 g sucrose in 10 mL water, respectively) and the concentration of  $\text{H}_2\text{SO}_4$  was 0.5 M.

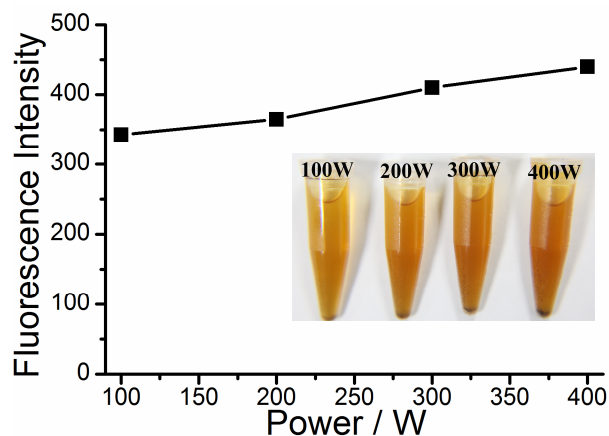

**Fig. S2** Fluorescence intensity ( $\lambda_{\text{ex}}=415 \text{ nm}$ ,  $\lambda_{\text{em}}=510 \text{ nm}$ ) of the CDs synthesized with different microwave power. (Synthesized by using 20% sucrose solution and 0.5 M  $\text{H}_2\text{SO}_4$ , and a reaction time of 15 min). With increasing power, carbonization of sugar is accelerated and the fluorescence of CDs increased fast, but we also notice that more black and non-fluorescent particle formed with higher power. So 200 W was chosen for the synthesis in our procedure. Insert: photographic images of CDs synthesized with different microwave power.

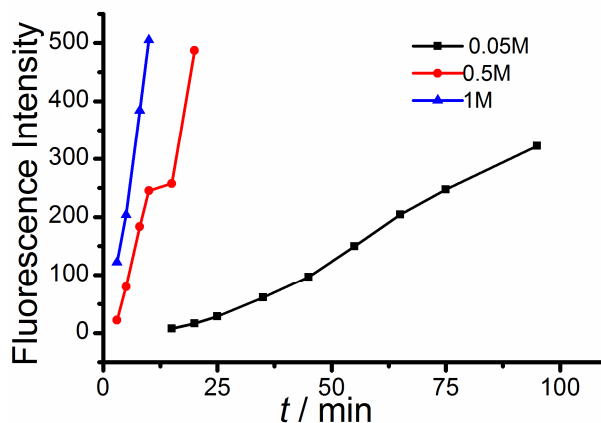

**Fig.S3** Fluorescence intensity ( $\lambda_{\text{ex}}=415$  nm,  $\lambda_{\text{em}}=510$  nm) of the CDs solution measured at different reaction time, synthesized by using 20% sucrose solution and different amount of  $\text{H}_2\text{SO}_4$ . Increasing the concentration of  $\text{H}^+$  aggravated the carbonization of sugar observably, more black and non-fluorescent particle formed when prolonging the microwave duration. To minimize the by-product, we chose 15 min as the reaction time when the concentration of  $\text{H}_2\text{SO}_4$  was 0.5 M.

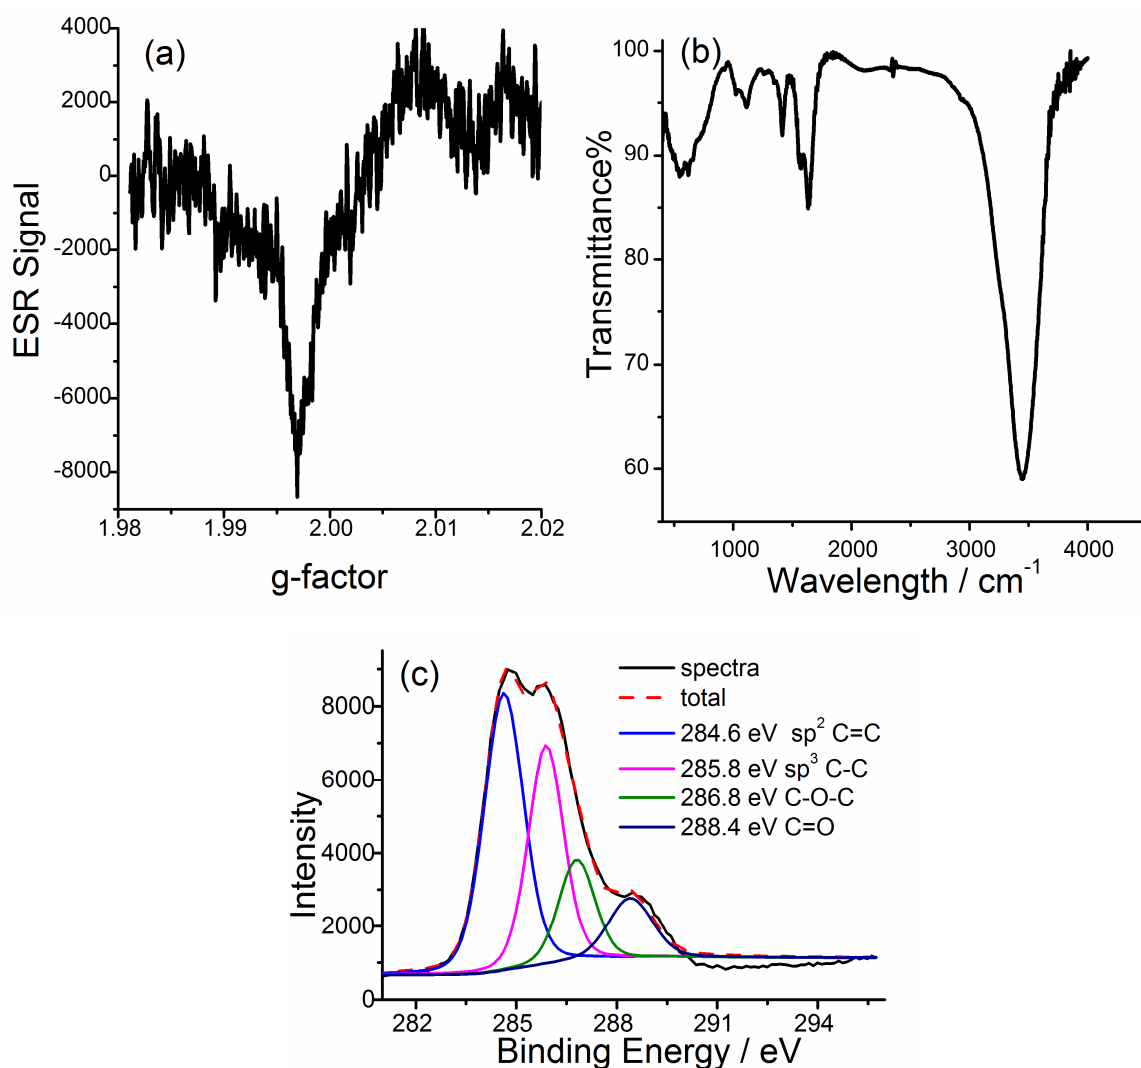

**Fig.S4** (a) ESR (b) FT-IR and (c) XPS spectra of the as-prepared CDs.

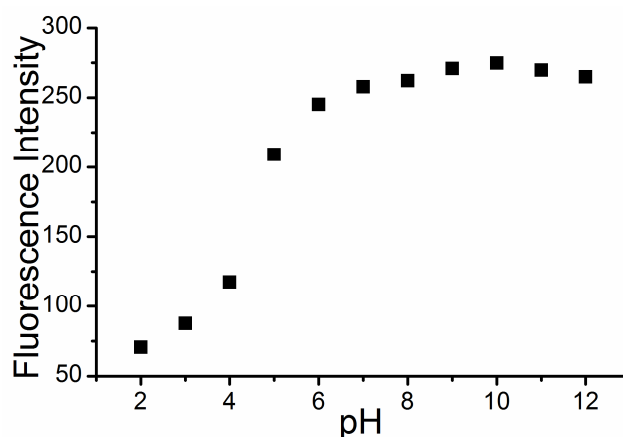

**Fig.S5** pH-dependent fluorescence intensity ( $\lambda_{\text{ex}}=420$  nm,  $\lambda_{\text{em}}=511$  nm) when pH is switched between 2 and 12 in B-R buffer.

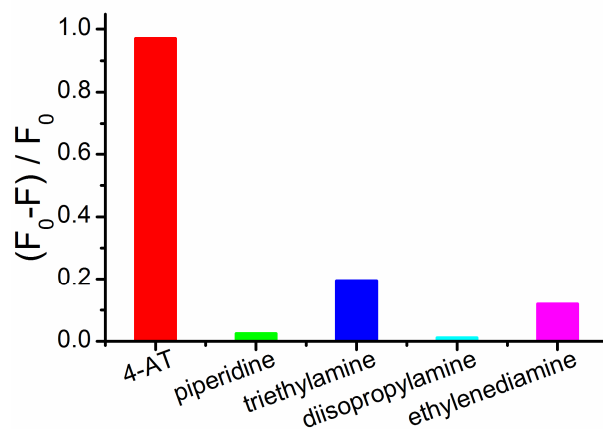

**Fig.S6** Intermolecular fluorescence quenching ( $\lambda_{\text{ex}}=415$  nm,  $\lambda_{\text{em}}=511$  nm) of CDs by piperidine, triethylamine, diisopropylamine and ethylenediamine (performed in pH 7.4, 0.2 M borate buffer, the concentration for each of triethylamine, diisopropylamine and ethylenediamine piperidine was 25 mM.  $F_0$  and  $F$  stand for fluorescence intensity of CDs in the absence and presence of amine, respectively).

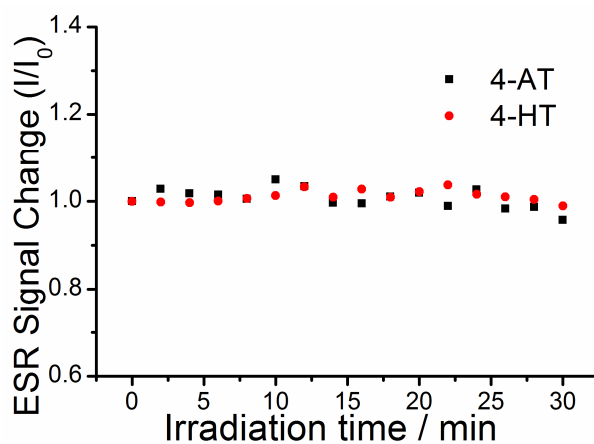

**Fig.S7** ESR signals of CDs as a function of UV irradiation duration in the presence of 4-AT (■) and 4-HT (●), respectively, in pH 7.4 boric buffer solution ( $[4\text{-AT}] = 2.67$  mM,  $[4\text{-HT}] = 33.3$  mM,  $I_0$  and  $I$  stands for ESR signals of mixture solution of CDs and TEMPO in the initial and under different UV irradiation duration, respectively).

**Table S1.** Quenching constants of CDs by 4-AT and 4-HT

|                            | 4-AT           | 4-HT              |
|----------------------------|----------------|-------------------|
|                            | $K_D / M^{-1}$ | $K_{SV} / M^{-1}$ |
| 0.2 M borate buffe(pH 7.4) | 28.2           | 23.4              |
| DMF                        | 23.5           | 21.6              |

**Tab.S1**  $K_{SV}$  is the Stern-Volmer constant which is related to the quenching efficiency at lower concentration of TEMPO calculated by (1),  $K_D$  was obtained by a linear Stern–Volmer equation between  $\tau_0/\tau$  and concentration of TEMPO as described in (2).

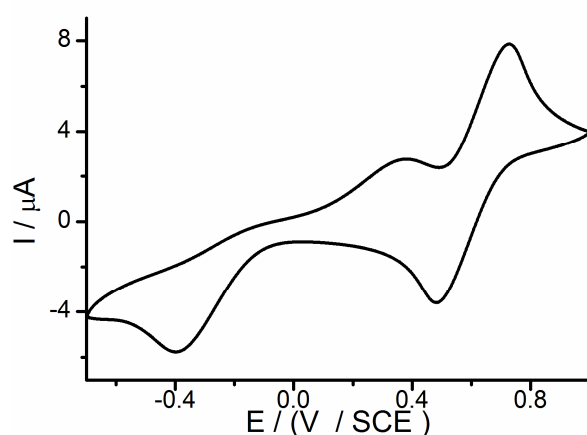

**Fig.S8** The cyclic voltammogram of 4-AT in 0.2 M borate buffer (pH 7.4), with glassy carbon electrode as the working electrode (scan rate:  $50 \text{ mV} \cdot \text{s}^{-1}$ ).

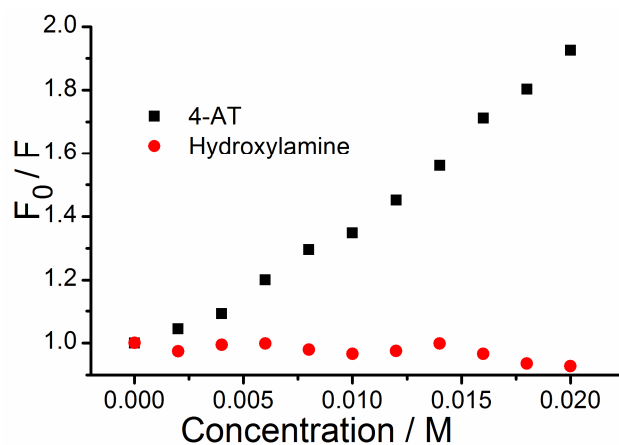

**Fig.S9** Fluorescence intensity ( $\lambda_{\text{ex}}=415 \text{ nm}$ ,  $\lambda_{\text{em}}=510 \text{ nm}$ ) of the CDs upon introduction of 4-AT (■) and hydroxylamine (●) (performed in pH 7.4, 0.2 M borate buffer).

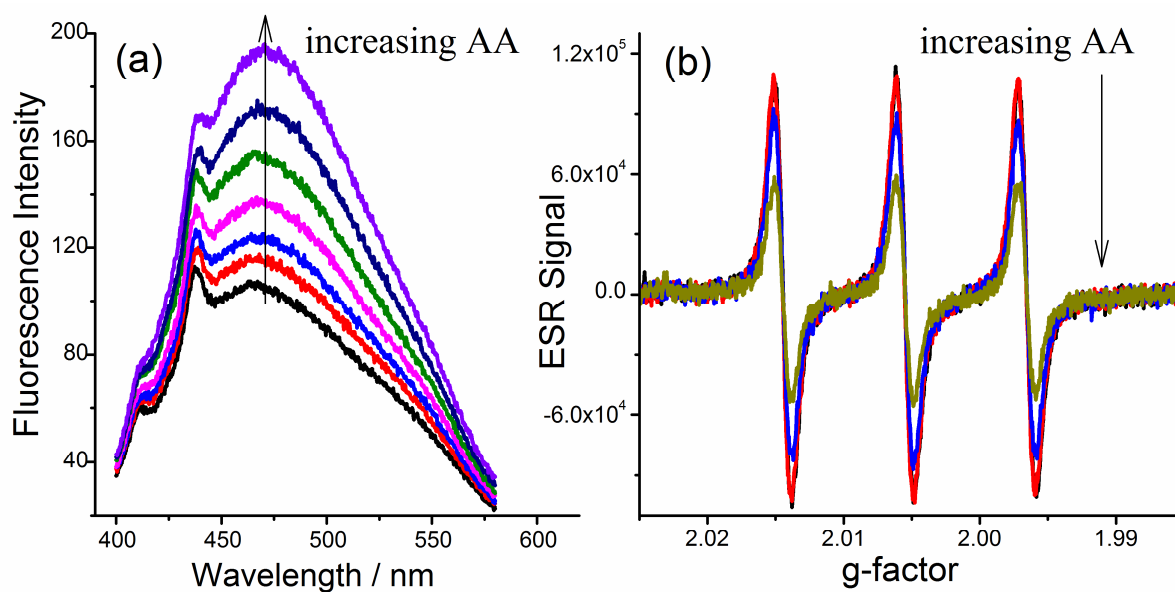

**Fig.S10** (a) Fluorescence restoration and (b) decay of the ESR signal of CD@TEMPO upon introduction of AA with concentration changing from 0.80 mM to 1.92 mM ( $\lambda_{\text{ex}}=385$  nm, slit width: 5 nm/5 nm) in DMF.

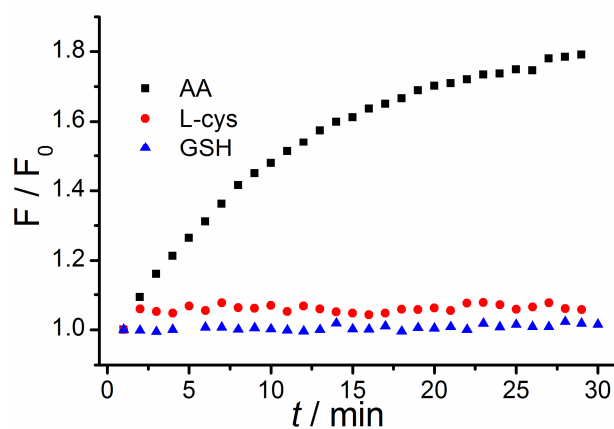

**Fig.S11** Time-dependent fluorescence ( $\lambda_{\text{ex}}=375$  nm,  $\lambda_{\text{em}}=470$  nm) following addition of 0.33 mM AA (■), 3.33 mM GSH (▲) and L-Cys (●) to a CDs solution in 0.2 M borate buffer at pH 7.4. F<sub>0</sub> and F represent fluorescence intensities of the spin-labeled CD-TEMPO in the presence and absence of antioxidant, respectively.
